# Supplementary material
Source: Royal Society of Chemistry journal article supplement (doi:10.1039/d6cp00354k)

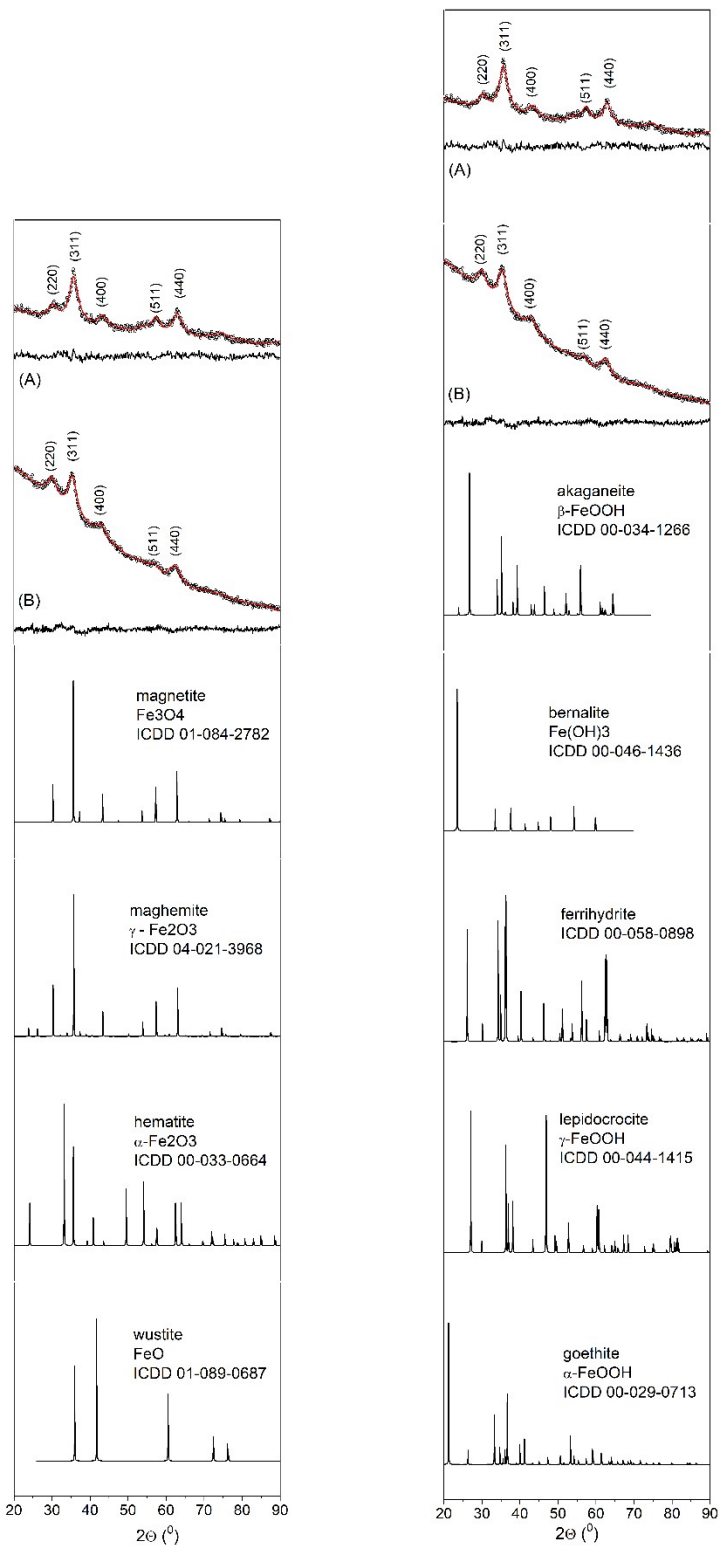

Supplement: d6cp00354k3.pdf [file d6cp00354k3.pdf]
